# Supplementary material
Source: PubMed Central journal article supplement (PMC5509526)
Supplement: NIHMS843568-supplement-supplement_1.pdf [file NIHMS843568-supplement-supplement_1.pdf]

## Family Asthma Study: Recruitment CONSORT Diagram

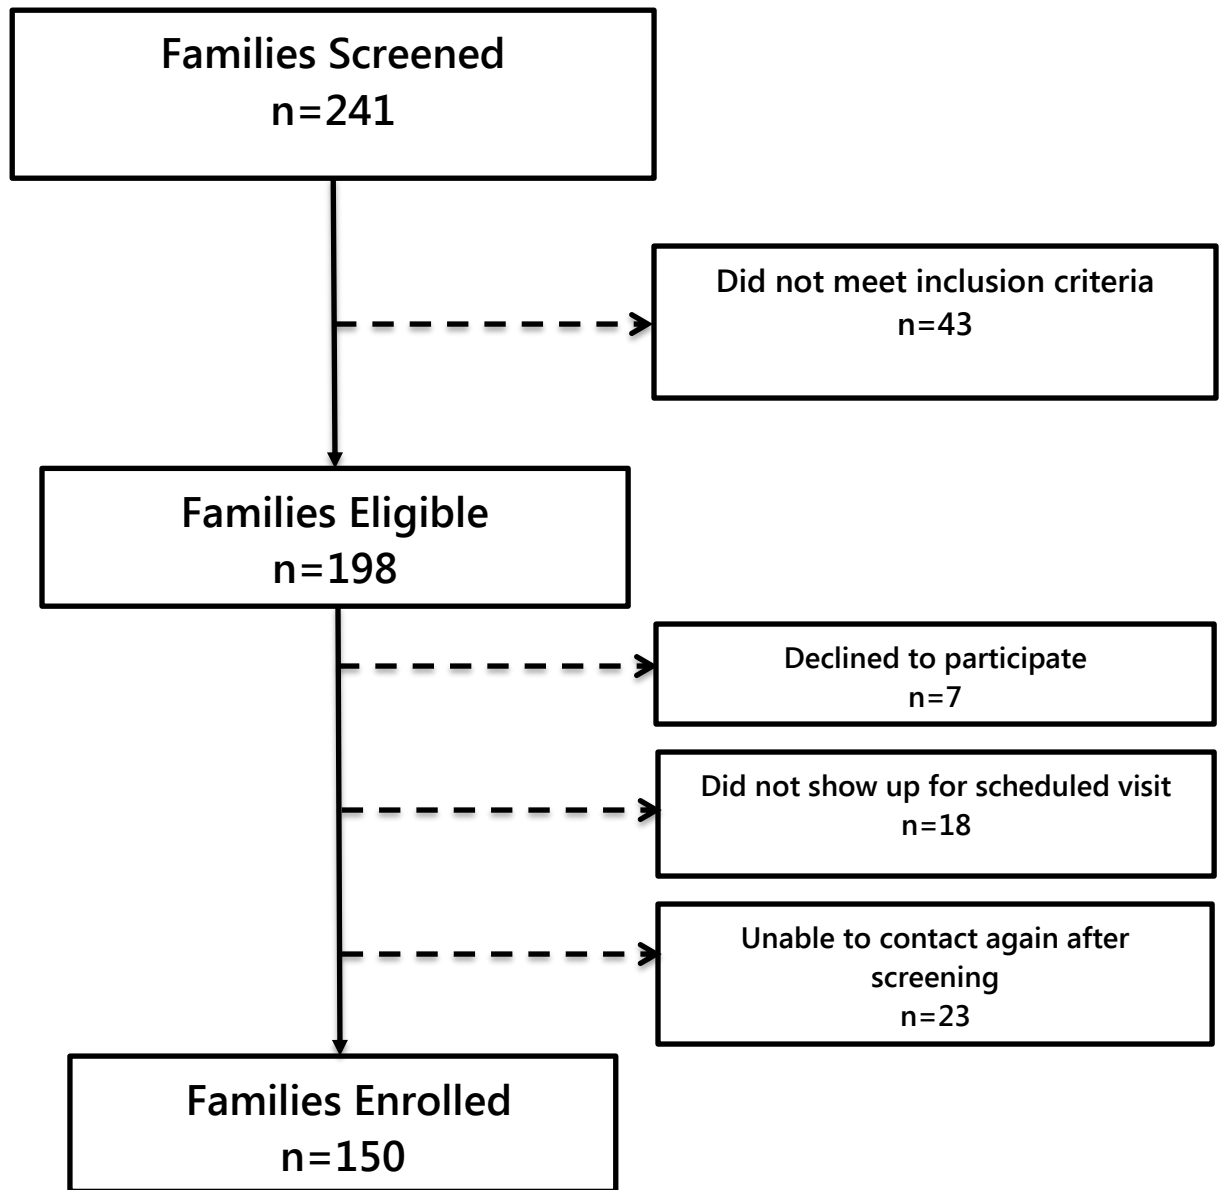

## ONLINE SUPPLEMENT

### Supplemental Results

We conducted supplemental analyses in which we created four groups of children: Low parent childhood SES-Low current SES (n=42); Low parent childhood SES-High current SES (n=25); High parent childhood SES-Low current SES (n=29); and High parent childhood SES-High current SES (n=49). We then tested whether asthma outcomes differed by the four groups. Similar patterns emerged as reported in the article. The four groups differed on the Asthma Control Test (parent report),  $F=4.82$ ,  $p=.003$ , such that the Low-Low group had the poorest asthma control. The patterns for the Asthma Control Test (child report) were in the same direction of the Low-Low group having the worst asthma control, but were not significant,  $F=2.06$ ,  $p=.108$ . The four groups also differed on Th-1 cytokine responses to PMA/INO,  $F=3.58$ ,  $p=.016$ . These differences were such that the Low-Low group had the highest Th-1 cytokine responses, followed closely by the Low-High group, and with the High-Low and High-High groups having smaller cytokine responses. The same relative patterns were found for Th-2 cytokine responses to PMA/INO, though the effects were not statistically significant,  $F=1.89$ ,  $p=.135$ .

**Supplemental Figure Legend**

Recruitment flowchart for the Family Asthma Study
